# Supplementary material
Source: PubMed Central journal article supplement (PMC4558301)
Supplement: NIHMS709855-supplement-Supplemental_figure.pdf [file NIHMS709855-supplement-Supplemental_figure.pdf]

## Supplement to “Log-gamma linear mixed-effects models for multiple outcomes with application to a longitudinal glaucoma study”

### 1 Two figures

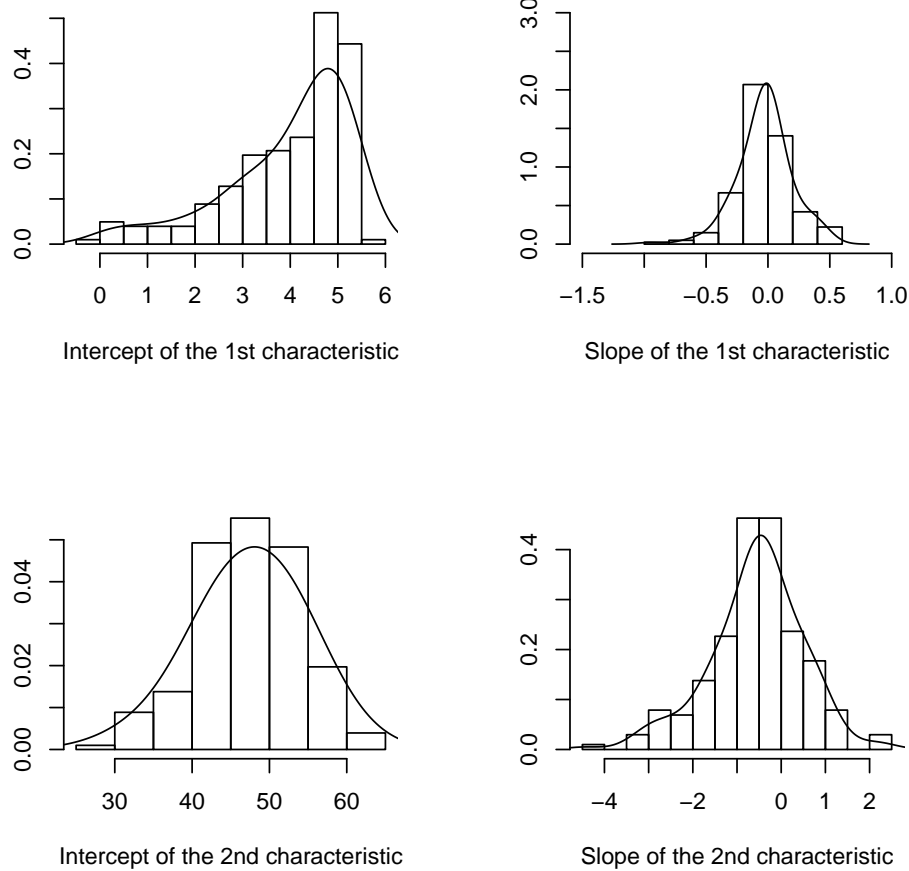

**Figure 1** Coefficients for the within-subject regressions of two outcomes on time

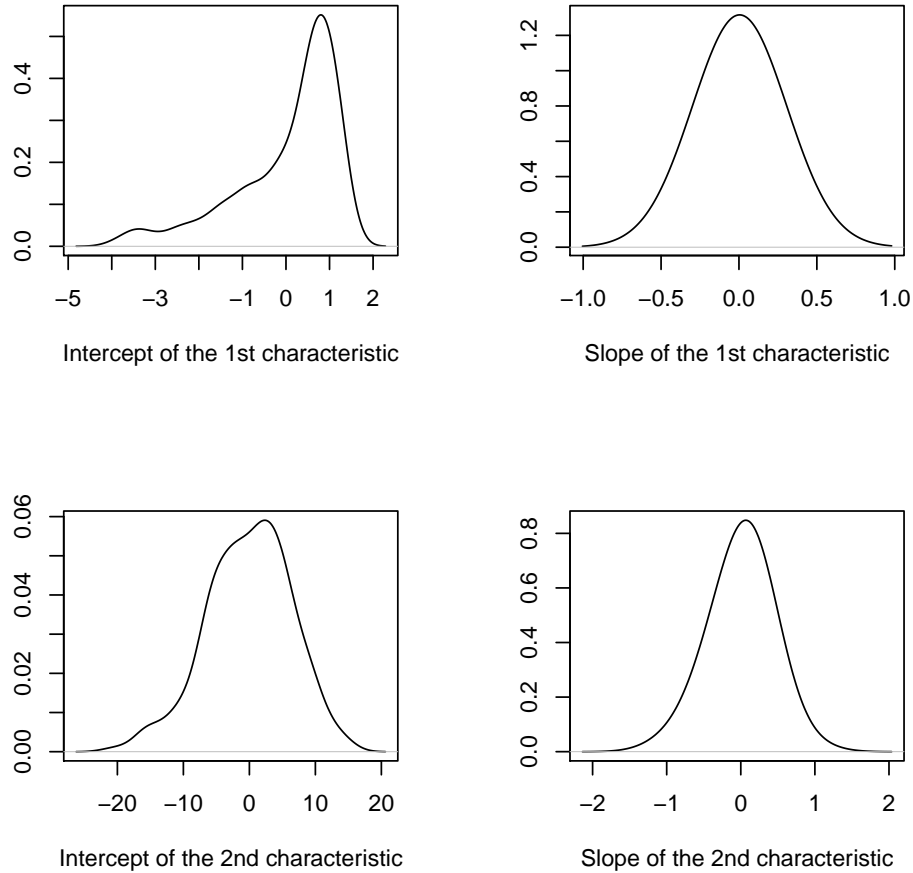

**Figure 2** Distributions of the empirical estimates of the random effects under the log-gamma model

## 2 Log-gamma distribution

In this section, we give a brief introduction to the log-gamma distribution. The log-gamma distribution can be symmetric, negatively skewed, positively skewed, or very skewed. The probability density function of the standard log-gamma random variable  $W$  is

$$f_W(w) = \frac{1}{\Gamma(\kappa)} e^{-e^w + \kappa w}, \quad w \in \mathbf{R}, \quad (1)$$

where  $\kappa > 0$  is the shape parameter. For the location parameter  $\mu \in \mathbf{R}$  and the scale parameter  $\eta > 0$ , the log-gamma location-scale family of probability density functions  $(1/\eta)f_W((w-\mu)/\eta)$  has mean  $\mu + \eta\psi(\kappa)$  and variance  $\eta^2\psi'(\kappa)$ , where  $\psi$  and  $\psi'$  are the digamma and trigamma functions. Figure 3 shows the log-gamma density functions with mean zero, scale parameter  $\eta = 1$ , and shape parameter  $\kappa$  changing from 0.1 to 5 by 0.1.

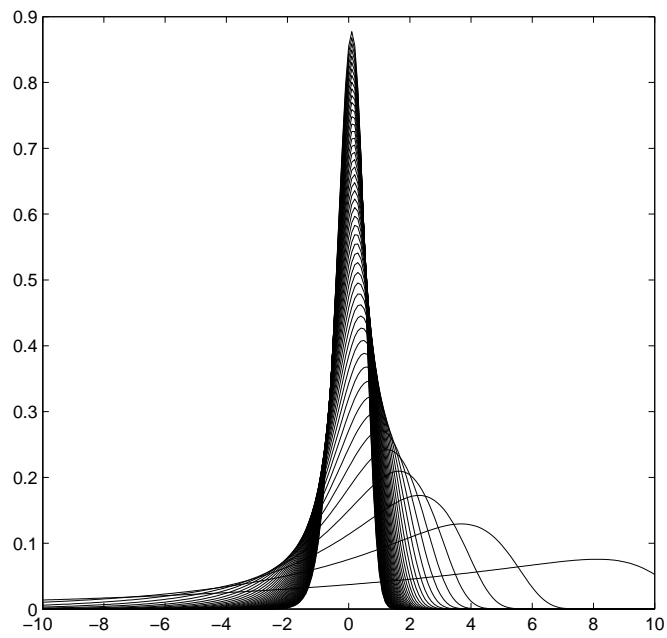

**Figure 3** Log-gamma density functions with different shape parameters
